# Supplementary figures and images for: NF-kappa B Signaling-Related Signatures Are Connected with the Mesenchymal Phenotype of Circulating Tumor Cells in Non-Metastatic Breast Cancer
Source: MDPI journal article supplement (doi:10.3390/cancers11121961), 2019-12-06

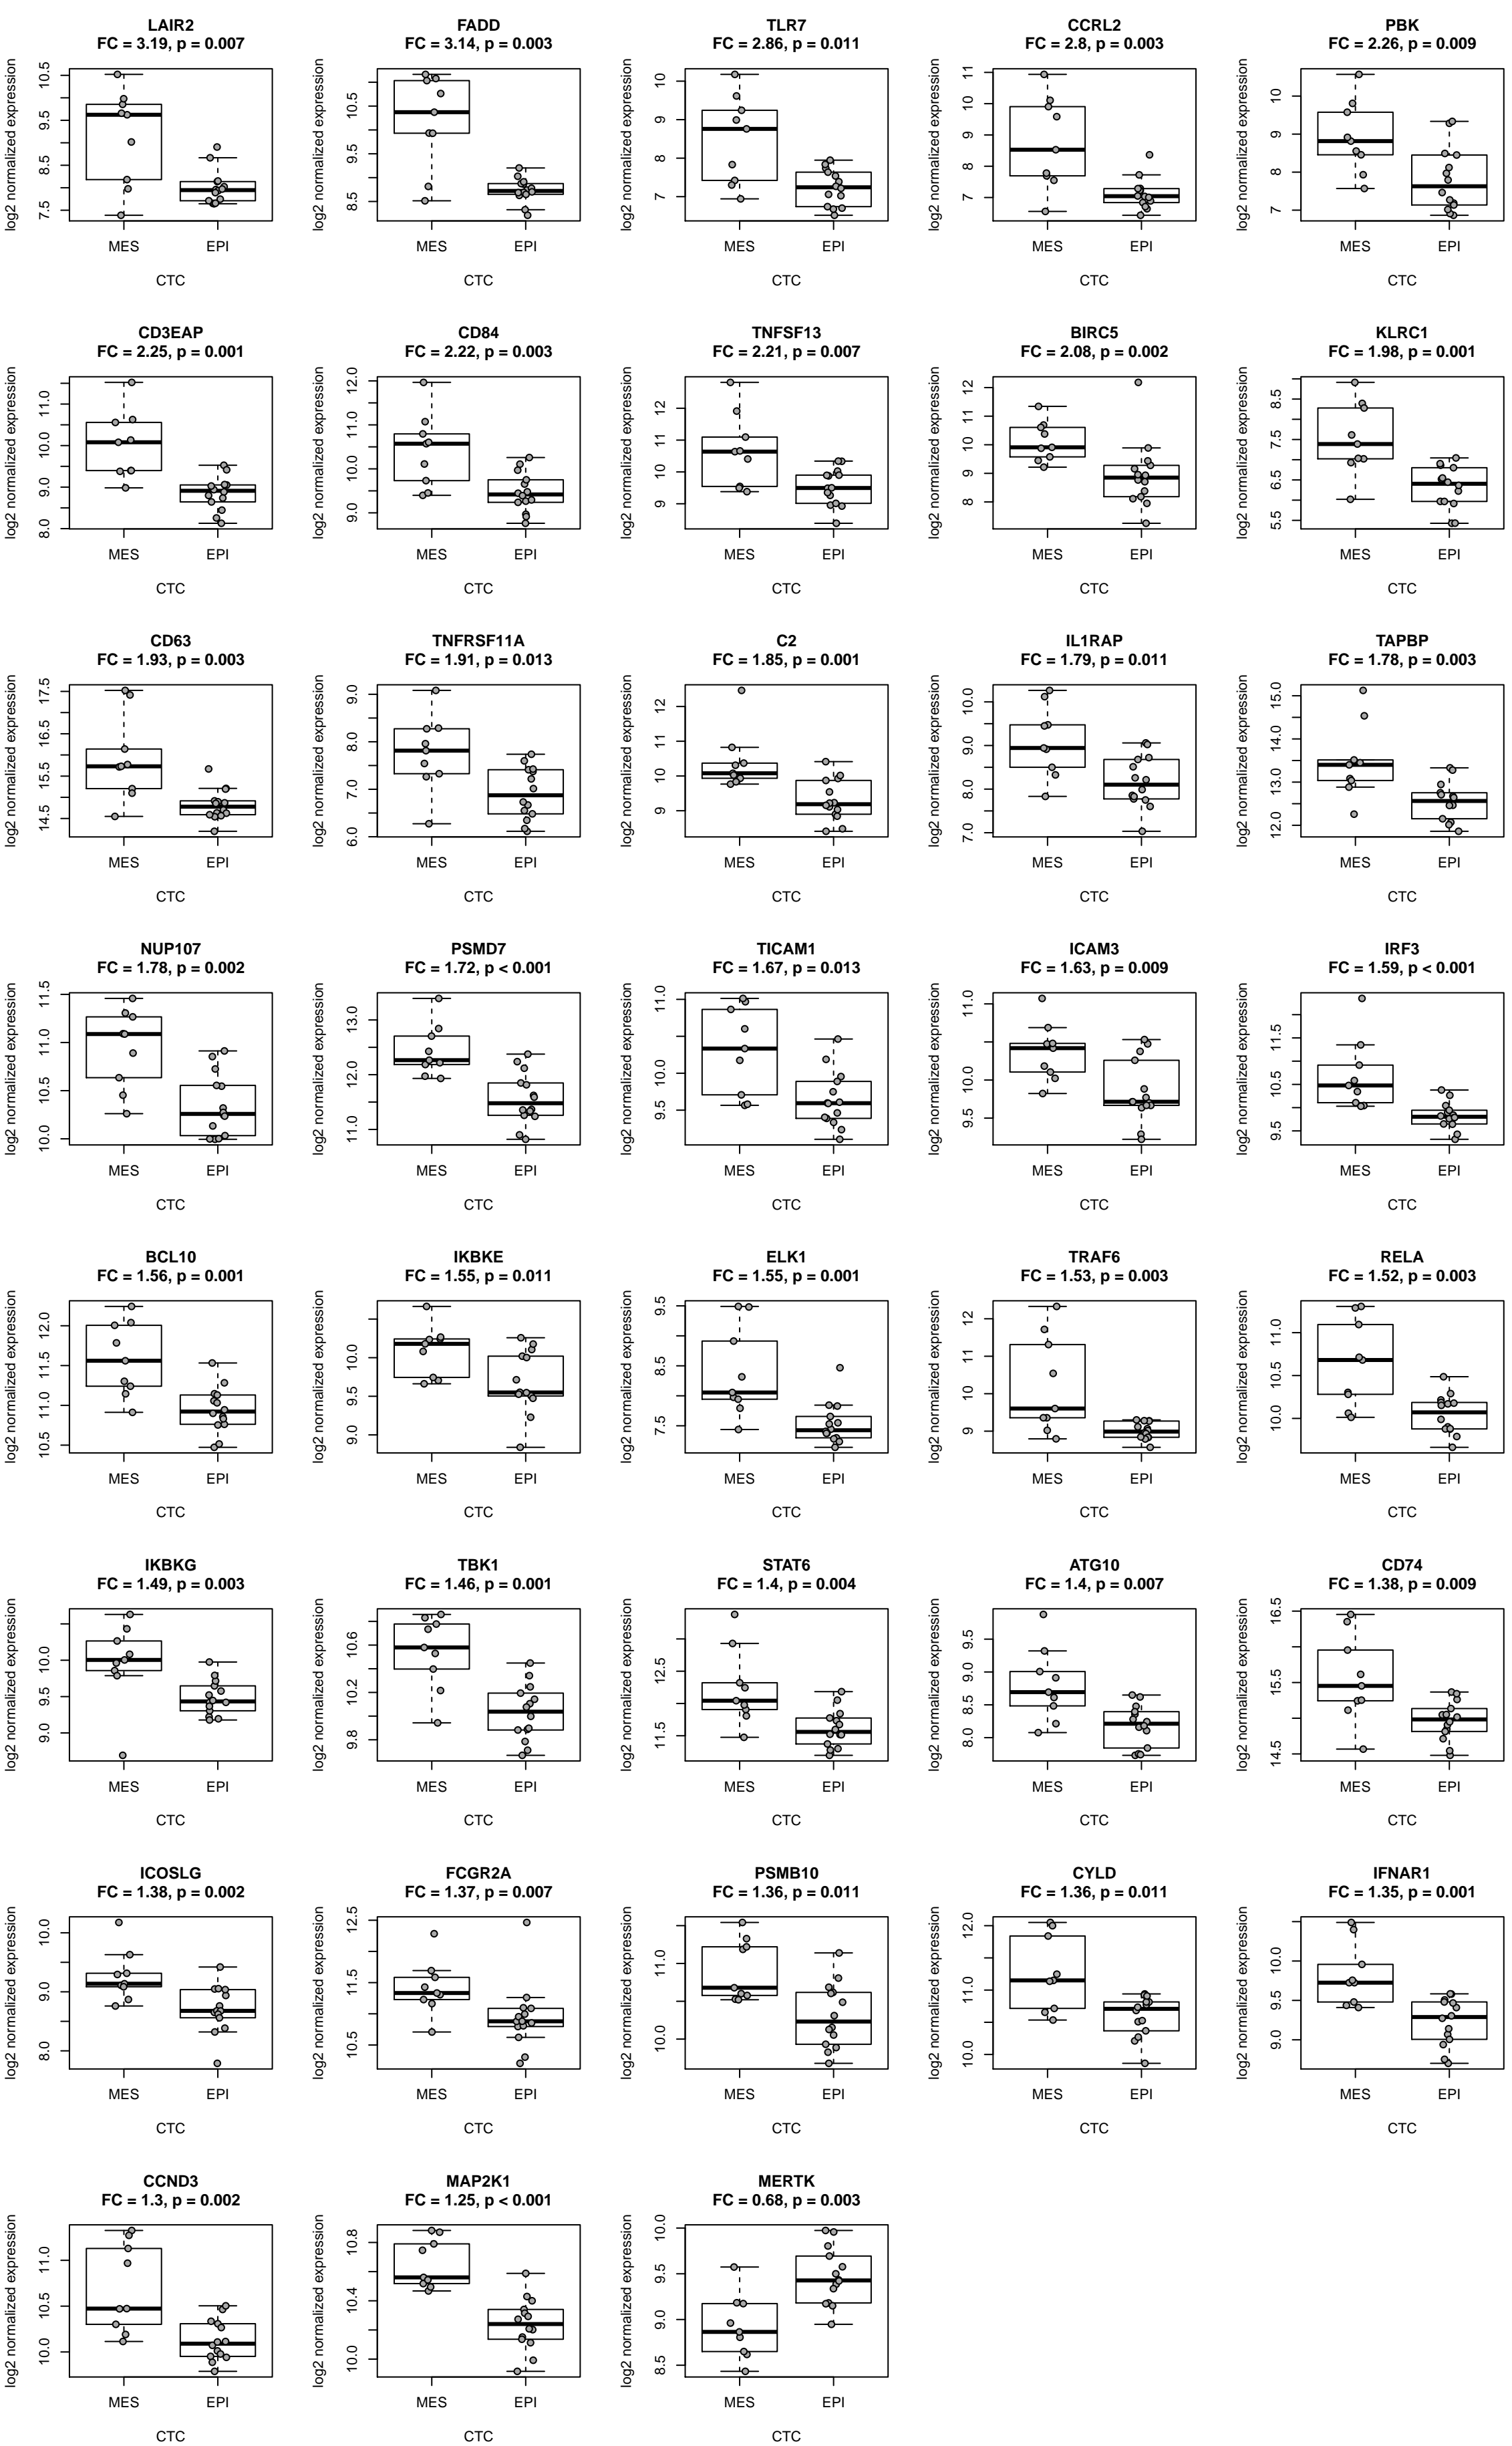

Supplement: s1 [file s1]
